# Supplementary material for: Differential Activation Patterns in the Same Brain Region Led to Opposite Emotional States
Source: PLoS Biol. 2016 Sep 8;14(9):e1002546. doi: 10.1371/journal.pbio.1002546 (PMC5015828; doi:10.1371/journal.pbio.1002546)
Supplement: S1 Table — (XLSX) [file pbio.1002546.s017.xlsx]

## Sheet: Sheet1
	Number of voxels
Region	Mean	s.e.m.
Cingulate cortex	2078	67
LPFC	2338	57
OFC	931	32
Occipitotemporal cortex	2196	53
Insular	1209	23
Basal ganglia	1269	27
Amygdala	236	6
Calcarine sulcus	578	15
Central sulcus	759	11
Collateral sulcus	769	26
Cuneus	690	18
Rectus gyrus	203	8
Inferior frontal gyrus	1115	26
Inferior occipital gyrus	1013	24
Inferior parietal lobe	1038	14
Inferior temporal gyrus	844	32
Inferior temporal sulcus	633	19
Intra-parietal sulcus	893	14
Lateral sulcus	1736	28
Middle occipital gyrus	726	22
Middle temporal gyrus	1347	28
Olfactory sulcus	116	7
Parahippocampal gyrus	208	10
Parieto-occipital sulcus	718	15
Postcentral gyrus	1747	25
Postcentral sulcus	1011	18
Precentral gyrus	1482	27
Precentral sulcus	906	24
Precuneus	925	22
Superior frontal gyrus	2503	59
Superior frontal sulcus	671	18
Superior occipital gyrus	621	20
Superior parietal lobe	1391	27
Superior temporal gyrus	1071	15
Superior temporal sulcus	999	22
Supra-marginal gyrus	1096	20
Transverse occipital sulcus	228	7
Uncus	78	4
